# Supplementary material for: Abacavir Induced T Cell Reactivity from Drug Naïve Individuals Shares Features of Allo-Immune Responses
Source: PLOS journal article supplement (doi:10.1371/journal.pone.0095339), 2014-04-21
Supplement: S3 (10.1371/journal.pone.0095339.s003) [file journal.pone.0095339.s003]

## TCC ID-145 B10

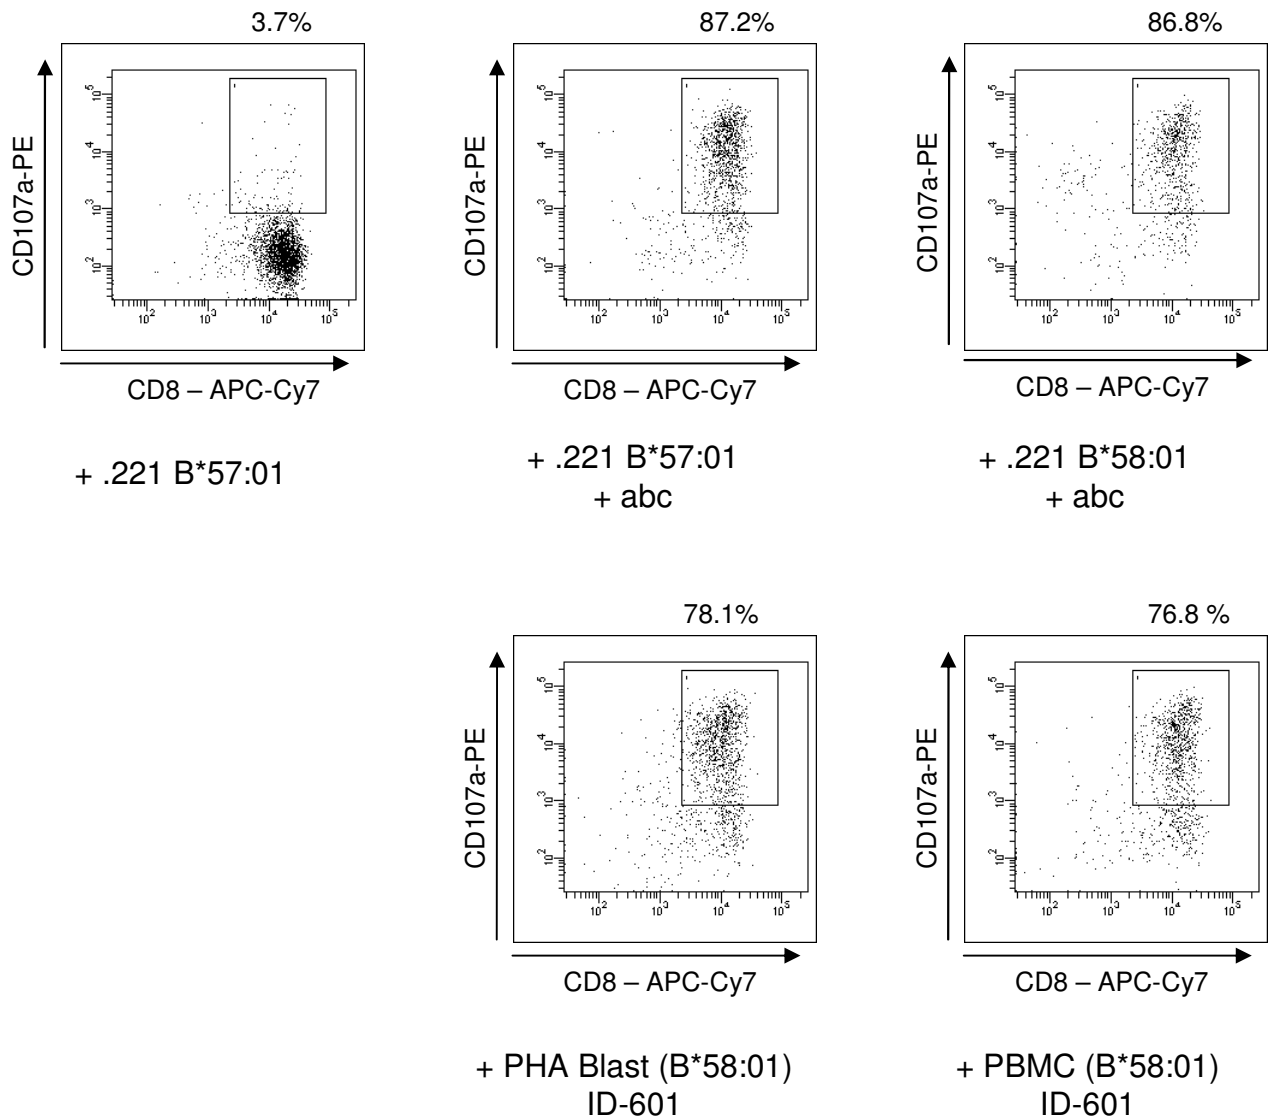

### Suppl. Figure S3. Allo-reactive TCC are stimulated by different types of APC.

TCC B10 from ID-145 was stimulated with .221 cells expressing HLA-B\*57:01, .221 cells expressing HLA-B\*57:01 pulsed with abacavir (10 µg/ml), .221 cells expressing HLA-B\*58:01, PHA blasts from donor ID-601 (HLA-B\*58:01<sup>+</sup>) and PBMC from donor ID-601 (HLA-B\*58:01<sup>+</sup>). All these APC were previously stained with CFSE and then excluded from the analyzed CD8<sup>+</sup> T cell gate. After a four hours re-challenge, cells were analyzed by flow cytometry. Plots are gated on CD3<sup>+</sup> CFSE<sup>-</sup> cells and percentages of CD8<sup>+</sup> CD107a<sup>+</sup> T cells are indicated above each plot.
